# Supplementary material
Source: publisher figshare collection journal article supplement (https://acs.figshare.com/ndownloader/files/3780871)
Supplement: Supplementary file 1 [file 3780871]

Compound	Smiles
10a	CNCCN(C1=CC=CC(CCC2=NC(N)=CC(C)=C2)=C1)C
10b	CN(C)CCNC1=CC=CC(CCC2=NC(N)=CC(C)=C2)=C1
10c	NCCN(C1=CC=CC(CCC2=NC(N)=CC(C)=C2)=C1)C
10d	NCCCN(C1=CC=CC(CCC2=NC(N)=CC(C)=C2)=C1)C
14a	CNCCN(C1=NC(CCC2=NC(N)=CC(C)=C2)=CC=C1)C
14b	CNCCN(C1=CC(CCC2=NC(N)=CC(C)=C2)=CN=C1)C
19a	CNCCN(C1=CC(C(F)(F)F)=CC(CCC2=NC(N)=CC(C)=C2)=C1)C
19b	CNCCN(C1=CC(F)=CC(CCC2=NC(N)=CC(C)=C2)=C1)C
19c	N#CC1=CC(N(C)CCNC)=CC(CCC2=NC(N)=CC(C)=C2)=C1
9	CC1=CC(N2C(C)=CC=C2C)=NC(CCC3=CC=CC(I)=C3)=C1
12a	CC1=CC(CCC2=NC(Br)=CC=C2)=NC(N3C(C)=CC=C3C)=C1
12b	CC1=CC(CCC2=CC(Br)=CN=C2)=NC(N3C(C)=CC=C3C)=C1
13a	CNCCN(C1=NC(CCC2=NC(N3C(C)=CC=C3C)=CC(C)=C2)=CC=C1)C
13b	CNCCN(C1=CC(CCC2=NC(N3C(C)=CC=C3C)=CC(C)=C2)=CN=C1)C
16a	CC1=CC(CCC2=CC(C(F)(F)F)=CC(Br)=C2)=NC(N3C(C)=CC=C3C)=C1
16b	CC1=CC(CCC2=CC(F)=CC(Br)=C2)=NC(N3C(C)=CC=C3C)=C1
16c	CC1=CC(CCC2=CC(Br)=CC(Br)=C2)=NC(N3C(C)=CC=C3C)=C1
17	N#CC1=CC(CCC2=NC(N3C(C)=CC=C3C)=CC(C)=C2)=CC(Br)=C1
18a	CNCCN(C1=CC(C(F)(F)F)=CC(CCC2=NC(N3C(C)=CC=C3C)=CC(C)=C2)=C1)C
18b	CNCCN(C1=CC(F)=CC(CCC2=NC(N3C(C)=CC=C3C)=CC(C)=C2)=C1)C
18c	N#CC1=CC(N(C)CCNC)=CC(CCC2=NC(N3C(C)=CC=C3C)=CC(C)=C2)=C1
